# Supplementary material for: Effects of Grape Pomace on Growth Performance, Nitrogen Metabolism, Antioxidants, and Microbial Diversity in Angus Bulls
Source: MDPI journal article supplement (doi:10.3390/antiox13040412), 2024-03-28
Supplement: s1 [file s1]

# Supplementary Materials:

**Supplementary Table S1.** Effects of dried grape pomace at different levels on bacterial composition in rumen and rectum at the phylum level (relative abundance > 0.01%) of beef cattle.

| Items             | G0                   | G10                  | G20                  | SEM     | P-value | Linear | Quadratic |
|-------------------|----------------------|----------------------|----------------------|---------|---------|--------|-----------|
| Rumen             |                      |                      |                      |         |         |        |           |
| Actinobacteriota  | 73.4                 | 50.0                 | 21.0                 | 12.101  | 0.213   | 0.082  | 0.912     |
| Bacteroidota      | 18340.8              | 18384.9              | 18674.4              | 740.161 | 0.982   | 0.860  | 0.940     |
| Cyanobacteria     | 20.0                 | 19.5                 | 11.7                 | 6.430   | 0.849   | 0.613  | 0.797     |
| Desulfobacterota  | 171.2                | 171.1                | 128.5                | 16.925  | 0.510   | 0.317  | 0.563     |
| Fibrobacterota    | 191.4                | 401.6                | 453.8                | 63.113  | 0.203   | 0.094  | 0.551     |
| Firmicutes        | 15256.7              | 15993.1              | 12696.4              | 847.579 | 0.257   | 0.222  | 0.265     |
| Patescibacteria   | 666.1                | 693                  | 631.3                | 46.206  | 0.870   | 0.768  | 0.665     |
| Proteobacteria    | 3489.4               | 2542.9               | 5202.5               | 612.207 | 0.203   | 0.252  | 0.167     |
| Spirochaetota     | 118.7                | 64.2                 | 419.5                | 84.788  | 0.186   | 0.149  | 0.252     |
| Verrucomicrobiota | 202                  | 217.2                | 240.5                | 29.809  | 0.876   | 0.613  | 0.951     |
| Rectum            |                      |                      |                      |         |         |        |           |
| Actinobacteriota  | 312.3 <sup>a</sup>   | 277.6 <sup>a</sup>   | 38.4 <sup>b</sup>    | 44.512  | 0.018   | 0.009  | 0.236     |
| Bacteroidota      | 12084.9              | 10744.1              | 9158.3               | 545.470 | 0.086   | 0.029  | 0.912     |
| Cyanobacteria     | 167.4                | 54.1                 | 52.0                 | 48.372  | 0.554   | 0.345  | 0.597     |
| Desulfobacterota  | 16.1 <sup>a</sup>    | 20.6 <sup>a</sup>    | 8.5 <sup>b</sup>     | 1.897   | 0.025   | 0.082  | 0.031     |
| Firmicutes        | 22211.5 <sup>b</sup> | 23137.9 <sup>b</sup> | 26445.4 <sup>a</sup> | 573.259 | 0.003   | 0.001  | 0.253     |
| Patescibacteria   | 246.3                | 186.0                | 245.7                | 40.687  | 0.797   | 0.995  | 0.505     |
| Proteobacteria    | 3322.3               | 4147.7               | 2628.2               | 394.136 | 0.299   | 0.474  | 0.168     |
| Spirochaetota     | 218.5                | 0.3                  | 0.0                  | 49.935  | 0.118   | 0.073  | 0.292     |

<sup>a, b</sup> Means within a row with different superscripts differ ( $P < 0.05$ ).

G0: the control group, G10: the 10% dried grape pomace treatment group, G20: the 20% dried grape pomace treatment group, SEM = standard error of the mean.

**Supplementary Table S2.** Effects of dried grape pomace at different levels on bacterial composition in rumen and rectum at the family level (relative abundance > 0.1%) of beef cattle.

| Family level             | G0                  | G10                 | G20                 | SEM     | P-value | Linear | Quadratic |
|--------------------------|---------------------|---------------------|---------------------|---------|---------|--------|-----------|
| Rumen                    |                     |                     |                     |         |         |        |           |
| Acidaminococcaceae       | 2884.2 <sup>a</sup> | 3360.7 <sup>a</sup> | 1734.6 <sup>b</sup> | 222.034 | 0.005   | 0.019  | 0.014     |
| Bacteroidales_RF16_group | 2105.5              | 1701.6              | 1458.4              | 238.988 | 0.552   | 0.285  | 0.877     |
| Christensenellaceae      | 619.1               | 749.4               | 598.2               | 100.611 | 0.813   | 0.935  | 0.527     |
| Clostridiaceae           | 28.4                | 26.7                | 11.5                | 5.860   | 0.447   | 0.252  | 0.594     |
| F082                     | 1148.4              | 1547.5              | 2829.1              | 338.247 | 0.103   | 0.043  | 0.524     |
| Lachnospiraceae          | 4100                | 3822.2              | 3488.4              | 363.154 | 0.801   | 0.509  | 0.972     |
| Muribaculaceae           | 833.5               | 744.7               | 506.5               | 77.146  | 0.206   | 0.088  | 0.644     |
| Oscillospiraceae         | 2717.8              | 3038.3              | 2579.2              | 166.044 | 0.528   | 0.739  | 0.284     |
| Prevotellaceae           | 11613.1             | 11593.9             | 9861.9              | 625.946 | 0.438   | 0.266  | 0.527     |
| Rikenellaceae            | 1888.4              | 2087.9              | 3182.3              | 294.020 | 0.155   | 0.074  | 0.465     |
| Ruminococcaceae          | 1589.3              | 1328.1              | 1202.6              | 140.078 | 0.533   | 0.275  | 0.823     |
| Selenomonadaceae         | 497.1               | 728.0               | 548.1               | 60.009  | 0.264   | 0.728  | 0.114     |
| Succinivibrionaceae      | 3419.3              | 2418.5              | 5023.9              | 615.267 | 0.224   | 0.287  | 0.170     |
| Rectum                   |                     |                     |                     |         |         |        |           |
| Acidaminococcaceae       | 813.7               | 817.5               | 566.5               | 51.523  | 0.070   | 0.047  | 0.225     |
| Bacteroidaceae           | 1170.7              | 1230.2              | 1199.6              | 129.342 | 0.984   | 0.930  | 0.875     |

|                          |                     |                     |                      |         |       |       |       |
|--------------------------|---------------------|---------------------|----------------------|---------|-------|-------|-------|
| Bacteroidales_RF16_group | 48.2                | 24.3                | 76.2                 | 21.204  | 0.623 | 0.601 | 0.415 |
| Christensenellaceae      | 270.1               | 345.0               | 513.3                | 49.827  | 0.123 | 0.047 | 0.649 |
| Clostridiaceae           | 736.3               | 953.8               | 1063.7               | 107.020 | 0.461 | 0.226 | 0.816 |
| Lachnospiraceae          | 8093.7 <sup>b</sup> | 8774.8 <sup>b</sup> | 10957.6 <sup>a</sup> | 474.557 | 0.030 | 0.012 | 0.420 |
| Muribaculaceae           | 1904.5              | 1873.0              | 1469.4               | 132.180 | 0.337 | 0.188 | 0.511 |
| Oscillospiraceae         | 5924.7              | 6851.2              | 7320.4               | 281.968 | 0.119 | 0.044 | 0.693 |
| Prevotellaceae           | 5369.1              | 4364.2              | 3127.8               | 427.956 | 0.098 | 0.033 | 0.894 |
| Rikenellaceae            | 2441.0              | 2463.9              | 2169.1               | 312.516 | 0.918 | 0.734 | 0.818 |
| Ruminococcaceae          | 1446.6              | 1046.7              | 916.8                | 134.068 | 0.250 | 0.113 | 0.634 |
| Selenomonadaceae         | 172.8               | 237.1               | 136.1                | 32.391  | 0.451 | 0.649 | 0.242 |
| Succinivibrionaceae      | 2769.1              | 3720.8              | 2152.7               | 403.570 | 0.288 | 0.534 | 0.149 |

<sup>a, b</sup> Means within a row with different superscripts differ ( $P < 0.05$ ).

G0: the control group, G10: the 10% dried grape pomace treatment group, G20: the 20% dried grape pomace treatment group, SEM = standard error of the mean.

**Supplementary Table S3.** Effects of dried grape pomace at different levels on bacterial composition in rumen and rectum at the genus level (relative abundance > 0.5%) of beef cattle.

| Family level                                 | G0                   | G10                 | G20                 | SEM     | P-value | Linear | Quadratic |
|----------------------------------------------|----------------------|---------------------|---------------------|---------|---------|--------|-----------|
| <b>Rumen</b>                                 |                      |                     |                     |         |         |        |           |
| <i>Alloprevotella</i>                        | 18.4                 | 16.5                | 55.2                | 16.211  | 0.563   | 0.369  | 0.566     |
| <i>Clostridium_sensu_stricto_1</i>           | 28.4                 | 26.7                | 11.5                | 5.860   | 0.447   | 0.252  | 0.594     |
| <i>NK4A214_group</i>                         | 1768.7               | 1855.3              | 1252.5              | 153.806 | 0.230   | 0.174  | 0.291     |
| <i>Prevotella</i>                            | 8932.3               | 9441.9              | 7879.1              | 626.663 | 0.600   | 0.506  | 0.450     |
| <i>Rikenellaceae_RC9_gut_group</i>           | 1881.8               | 2069.9              | 3164.7              | 294.459 | 0.159   | 0.077  | 0.460     |
| <i>Ruminococcus</i>                          | 1126.9               | 845.9               | 726.0               | 97.564  | 0.233   | 0.099  | 0.695     |
| <i>Succinivibrio</i>                         | 85.1                 | 90.8                | 129.4               | 27.174  | 0.782   | 0.522  | 0.783     |
| <i>Succinivibrionaceae_UCG_002</i>           | 1318.2               | 1052.0              | 2587.4              | 376.934 | 0.211   | 0.171  | 0.260     |
| <i>UCG_005</i>                               | 225.0                | 306.9               | 297.0               | 31.860  | 0.535   | 0.370  | 0.508     |
| <i>unclassified_Bacteroidales_RF16_group</i> | 1915.8               | 1598.7              | 1353.6              | 223.971 | 0.606   | 0.323  | 0.941     |
| <i>unclassified_F082</i>                     | 833.6                | 1061.8              | 995.8               | 123.122 | 0.752   | 0.604  | 0.587     |
| <i>unclassified_Lachnospiraceae</i>          | 1139.3               | 758.0               | 784.4               | 167.555 | 0.600   | 0.403  | 0.577     |
| <i>unclassified_Muribaculaceae</i>           | 38.3                 | 28.9                | 47.2                | 7.645   | 0.636   | 0.645  | 0.409     |
| <i>unclassified_Prevotellaceae</i>           | 933.7 <sup>a</sup>   | 795.4 <sup>ab</sup> | 512.7 <sup>b</sup>  | 70.425  | 0.039   | 0.013  | 0.603     |
| <i>unclassified_Succinivibrionaceae</i>      | 627.3 <sup>b</sup>   | 474.2 <sup>b</sup>  | 1758.9 <sup>a</sup> | 220.851 | 0.028   | 0.029  | 0.103     |
| <i>uncultured_rumen_bacterium</i>            | 2622.2 <sup>ab</sup> | 2960.0 <sup>a</sup> | 2164.8 <sup>b</sup> | 130.996 | 0.039   | 0.133  | 0.035     |
| <i>Succiniclasticum</i>                      | 2884.2 <sup>a</sup>  | 3360.3 <sup>a</sup> | 1734.4 <sup>b</sup> | 222.041 | 0.005   | 0.019  | 0.014     |
| <b>Rectum</b>                                |                      |                     |                     |         |         |        |           |
| <i>Agathobacter</i>                          | 980.7                | 895.2               | 868.6               | 92.192  | 0.882   | 0.634  | 0.885     |
| <i>Alloprevotella</i>                        | 1389.5               | 1016.7              | 719.8               | 150.924 | 0.196   | 0.074  | 0.904     |
| <i>Bacteroides</i>                           | 1170.7               | 1230.2              | 1199.6              | 129.342 | 0.984   | 0.930  | 0.875     |
| <i>Clostridium_sensu_stricto_1</i>           | 700.3                | 934.4               | 963.2               | 100.888 | 0.522   | 0.302  | 0.639     |
| <i>NK4A214_group</i>                         | 144.5                | 173.6               | 354.3               | 39.320  | 0.056   | 0.027  | 0.338     |
| <i>Prevotella</i>                            | 408.1                | 231.2               | 173.8               | 47.492  | 0.108   | 0.044  | 0.540     |
| <i>Prevotella_9</i>                          | 2413.6               | 1838.1              | 1115.8              | 268.460 | 0.141   | 0.050  | 0.895     |
| <i>Rikenellaceae_RC9_gut_group</i>           | 1577.3               | 2009.0              | 1616.4              | 221.882 | 0.695   | 0.944  | 0.399     |
| <i>Ruminococcus</i>                          | 136.1                | 134.1               | 184.1               | 30.114  | 0.758   | 0.531  | 0.695     |
| <i>Succinivibrio</i>                         | 2191.5               | 3615.6              | 1999.5              | 373.850 | 0.157   | 0.830  | 0.058     |
| <i>UCG_005</i>                               | 5139.9               | 6127.0              | 6279.7              | 272.953 | 0.183   | 0.091  | 0.465     |
| <i>unclassified_Lachnospiraceae</i>          | 5018.6               | 4896.0              | 6349.9              | 286.107 | 0.066   | 0.053  | 0.177     |
| <i>unclassified_Muribaculaceae</i>           | 1562.0               | 1640.6              | 1217.4              | 118.560 | 0.311   | 0.242  | 0.324     |
| <i>unclassified_Prevotellaceae</i>           | 939.1                | 830.1               | 466.7               | 109.116 | 0.183   | 0.080  | 0.577     |

|                                   |       |      |       |        |       |       |       |
|-----------------------------------|-------|------|-------|--------|-------|-------|-------|
| <i>uncultured_rumen_bacterium</i> | 194.0 | 60.4 | 116.3 | 38.135 | 0.369 | 0.412 | 0.251 |
| <i>Succiniclasticum</i>           | 3.0   | 0.7  | 5.3   | 0.946  | 0.139 | 0.312 | 0.085 |

<sup>a; b</sup> Means within a row with different superscripts differ ( $P<0.05$ ).

G0: the control group, G10: the 10% dried grape pomace treatment group, G20: the 20% dried grape pomace treatment group, SEM = standard error of the mean.
